# Supplementary material for: Tuning the phase, morphology and size of monodisperse ScF3and NaScF4crystals through lanthanide doping
Source: Royal Society of Chemistry journal article supplement (doi:10.1039/c6ce01198e), 2016-01-01
Supplement: c6ce01198e1.pdf [file c6ce01198e1.pdf]

## **Tuning the phase, morphology and size of monodisperse ScF<sub>3</sub> and NaScF<sub>4</sub> crystals through lanthanide doping**

### **Supporting Information**

Jingjing Cao<sup>a</sup>, Li Yuan<sup>a</sup>, Shanshan Hu<sup>\*a</sup>, Jianfeng Tang<sup>a</sup>, Xianju Zhou<sup>b</sup> and Jun Yang<sup>\*a</sup>

- a. School of Chemistry and Chemical Engineering, No. 2 Tiansheng Road, BeiBei District, Chongqing, 400715, China. E-mail: hushan3@swu.edu.cn and jyang@swu.edu.cn.
- b. School of Mathematics and Physics, Chongqing University of Posts and Telecommunications, Chongqing, 400065, China

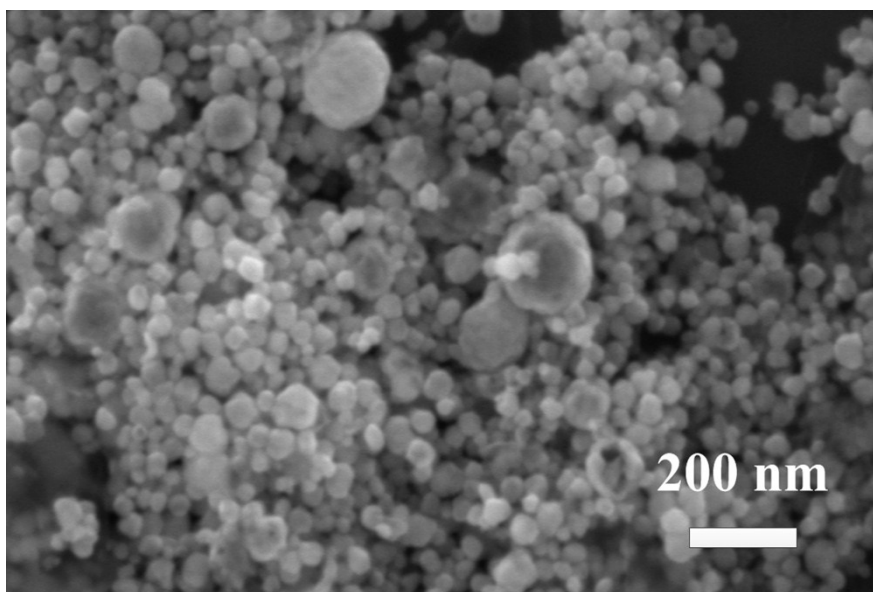

**Fig. S1** SEM image of  $\text{Na}_7\text{Lu}_{13}\text{F}_{46}$  prepared by doping 70 mol %  $\text{Lu}^{3+}$  under the condition of  $\text{Na}/\text{F}/(\text{Sc}+\text{Ln})=5:3:1$ .

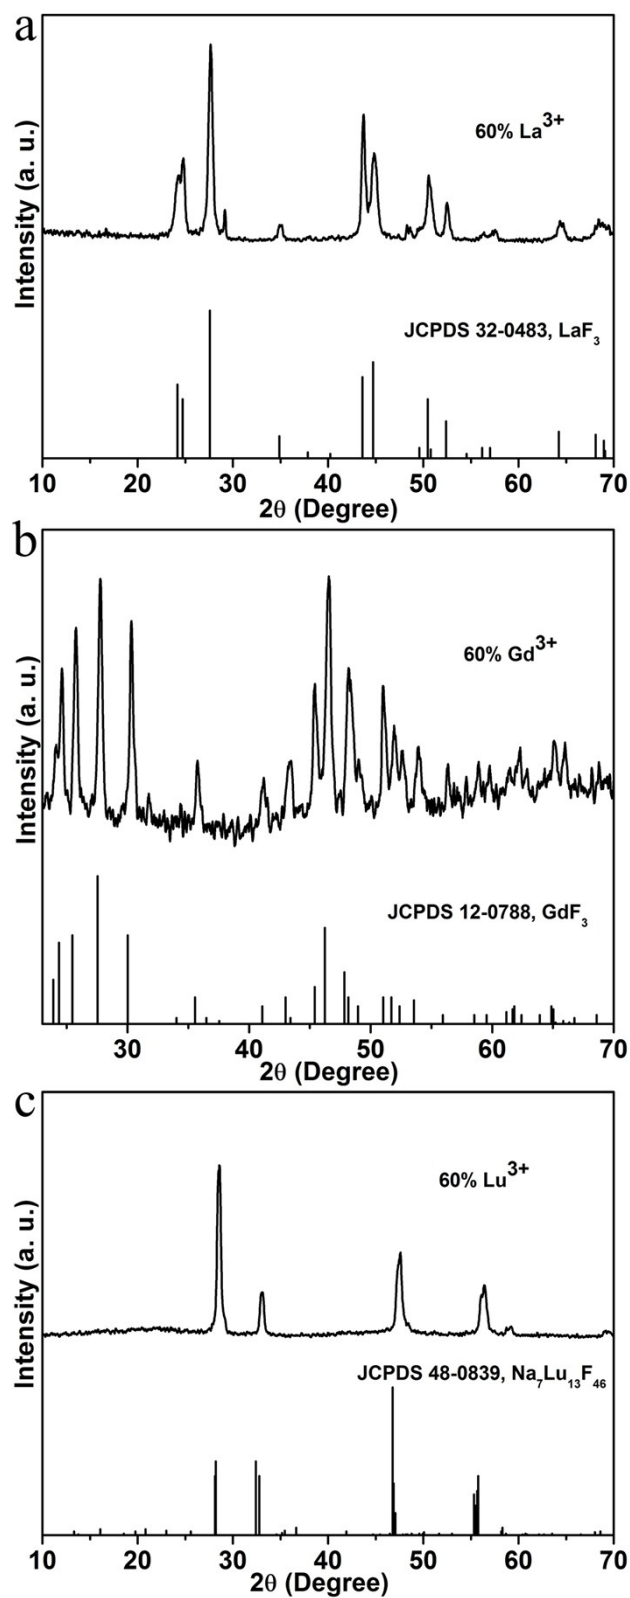

**Fig. S2** XRD patterns of the products prepared in the presence of 60 mol%  $\text{La}^{3+}$  (a),  $\text{Gd}^{3+}$  (b),  $\text{Lu}^{3+}$  (c) under the condition of  $\text{Na}/\text{F}/(\text{Sc}+\text{Ln})=5:4:1$

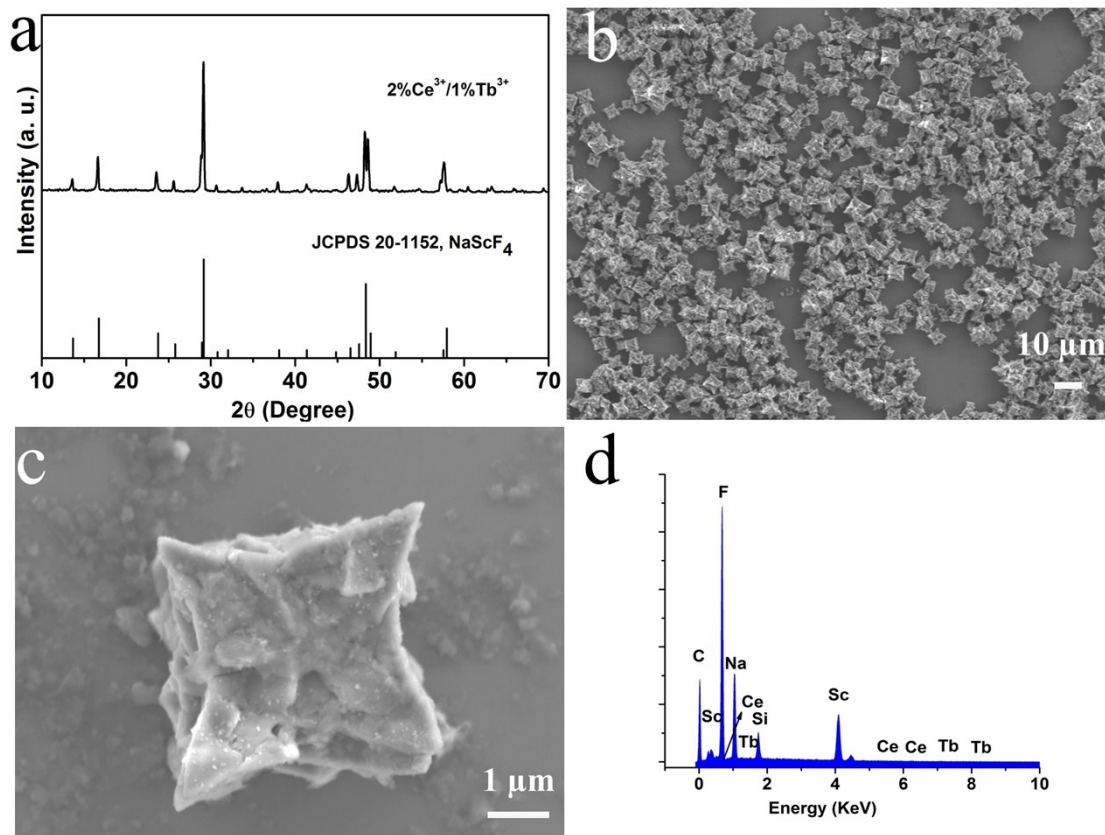

**Fig. S3** (a) XRD pattern, (b, c) SEM images and (d) EDS pattern of the prepared product doped with 2% Ce<sup>3+</sup>/1% Tb<sup>3+</sup> under the condition of Na/F/(Sc+Ln)=5:4:1.

Fig. S3(a) shows the XRD pattern of the prepared products doped with 2% Ce<sup>3+</sup>/1% Tb<sup>3+</sup>, which matches well with pure Monoclinic ScF<sub>3</sub> phase. Fig. S3(b), 3(c) present the morphology of the product is four-angle star.

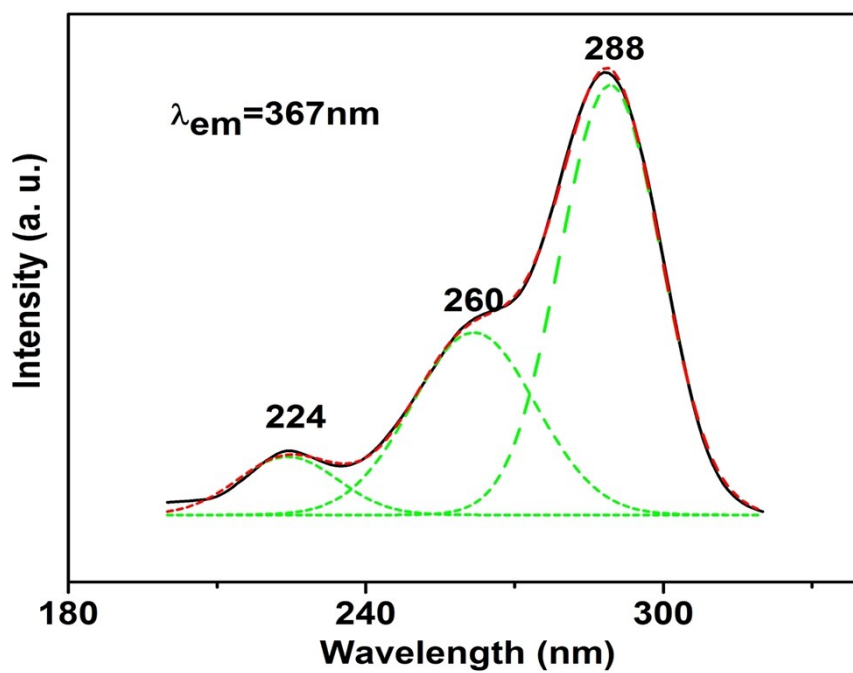

**Fig. S4** The Gaussian fitting bands of excitation spectrum for NaScF<sub>4</sub>:1% Ce<sup>3+</sup> sample.

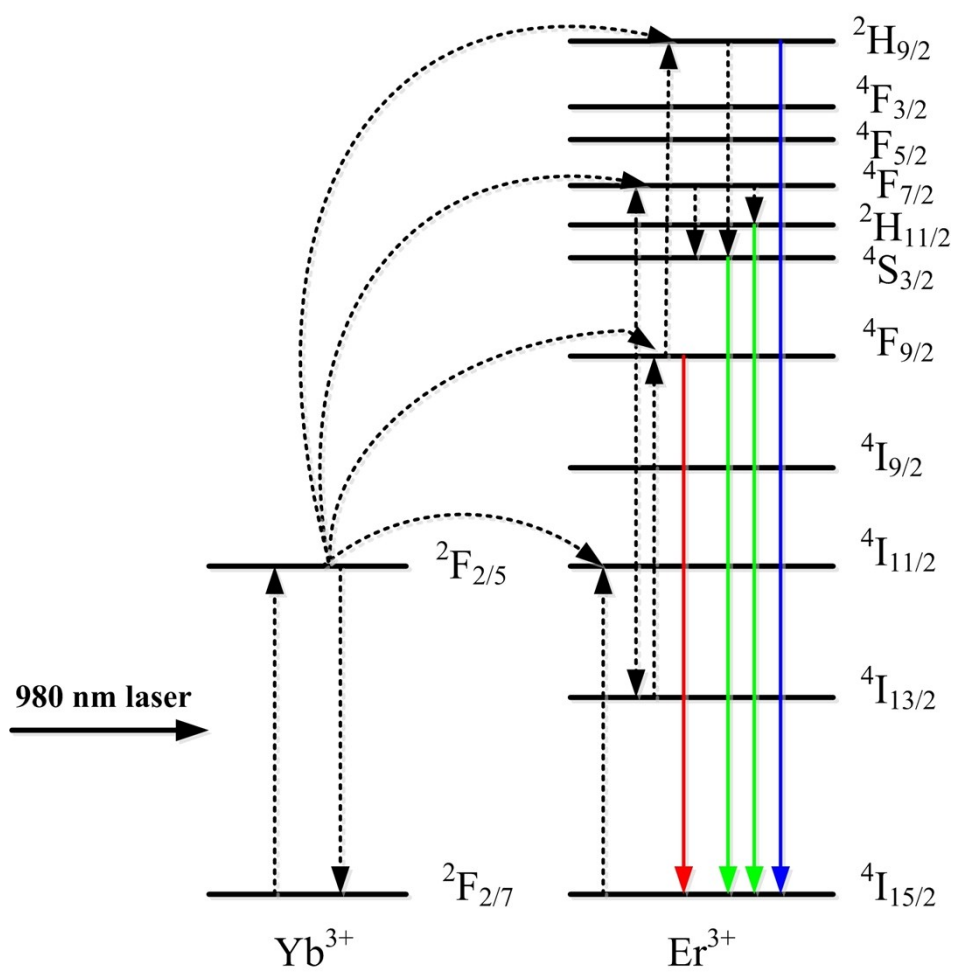

**Fig. S5** UC energy transfer mechanisms of  $\text{ScF}_3$ :30%  $\text{Yb}^{3+}$ /1%  $\text{Er}^{3+}$  excited with a 980 nm laser under the condition of  $\text{Na}/\text{F}/(\text{Sc}+\text{Ln})=5:4:1$ .

**Table S1** Phases, morphologies and sizes of the products with different kinds of and different levels of Ln<sup>3+</sup> doping (Ln=Ce, Eu and Lu) under the condition of Na/F/(Sc+Ln)=5:3:1.

| Ln <sup>3+</sup> concentration | Phase                                                                 | Morphology | Size              |
|--------------------------------|-----------------------------------------------------------------------|------------|-------------------|
| Ce <sup>3+</sup> : 0.01 %~1 %  | ScF <sub>3</sub>                                                      | Cube       | S=3μm             |
| Ce <sup>3+</sup> : 5 %~70 %    | ScF <sub>3</sub> and CeF <sub>3</sub>                                 |            |                   |
| Eu <sup>3+</sup> : 0.01 %~1 %  | ScF <sub>3</sub>                                                      | Cube       | S=2μm             |
| Eu <sup>3+</sup> : 5 %~40 %    | ScF <sub>3</sub> and EuF <sub>3</sub>                                 |            |                   |
| Lu <sup>3+</sup> : 0.01 %~20 % | ScF <sub>3</sub>                                                      | Cuboid     | L=900nm<br>W=60nm |
| Lu <sup>3+</sup> : 30 %~50 %   | ScF <sub>3</sub> and Na <sub>7</sub> Lu <sub>13</sub> F <sub>46</sub> |            |                   |
| Lu <sup>3+</sup> : 70 %        | Na <sub>7</sub> Lu <sub>13</sub> F <sub>46</sub>                      | Sphere     | D=60nm            |

**Table S2** Phases, morphologies and sizes of the products doped with three groups of 1% light, medium and heavy rare earth ions under the condition of Na/F/(Sc+Ln)=5:4:1.

| Rare earth ions | 1% Ln <sup>3+</sup>                  | Crystal phase                | Shape           | Size                               |
|-----------------|--------------------------------------|------------------------------|-----------------|------------------------------------|
| Light           | Ce <sup>3+</sup> or Pr <sup>3+</sup> | Hexagonal NaScF <sub>4</sub> | Four-angle star | <i>L</i> =2.5μm                    |
| Medium          | Gd <sup>3+</sup> or Tb <sup>3+</sup> | Monoclinic ScF <sub>3</sub>  | Cube            | <i>D</i> =50nm                     |
| Heavy           | Er <sup>3+</sup> or Lu <sup>3+</sup> | Hexagonal NaScF <sub>4</sub> | Micro-rod       | <i>L</i> =2.5μm<br><i>D</i> =500nm |



**Table S3** The summary of the changes of phases, morphologies and sizes of the products with different Lu<sup>3+</sup> doping concentrations under the condition of Na/F/(Sc+Ln)=5:4:1.

| Sample | Lu <sup>3+</sup> | Crystal phase                                                                                 | Shape                | Size                               |
|--------|------------------|-----------------------------------------------------------------------------------------------|----------------------|------------------------------------|
| A      | 0 %              | Hexagonal NaScF <sub>4</sub>                                                                  | Nano-rod             | <i>l</i> =650nm<br><i>W</i> =300nm |
| B      | 1 %              | Hexagonal NaScF <sub>4</sub>                                                                  | Micro-rod            | <i>l</i> =2.5μm<br><i>W</i> =500nm |
| C      | 8%               | Hexagonal NaScF <sub>4</sub>                                                                  | Shuttle              | <i>l</i> =1.5μm                    |
| D      | 15 %             | Monoclinic ScF <sub>3</sub> and hexagonal NaScF <sub>4</sub>                                  | Shuttle and wafer    | <i>l</i> =2.5μm<br><i>d</i> =260nm |
| E      | 30 %             | Monoclinic ScF <sub>3</sub> and orthorhombic Na <sub>7</sub> Lu <sub>13</sub> F <sub>46</sub> | Wafer and zonal body | <i>d</i> =260nm<br><i>l</i> =2.5μm |
| F      | 60 %             | Orthorhombic Na <sub>7</sub> Lu <sub>13</sub> F <sub>46</sub>                                 | Sphere               | <i>d</i> =60nm                     |
